# Supplementary figures and images for: Vertical PAP Flap: Simultaneous Longitudinal Profunda Artery Perforator Flaps for Bilateral Breast Reconstructions
Source: PubMed Central journal article supplement — Plast Reconstr Surg Glob Open. 2017 Feb 21;5(2):e1189. doi: 10.1097/GOX.0000000000001189 (PMC5340472; doi:10.1097/gox.0000000000001189), 2017-02-21

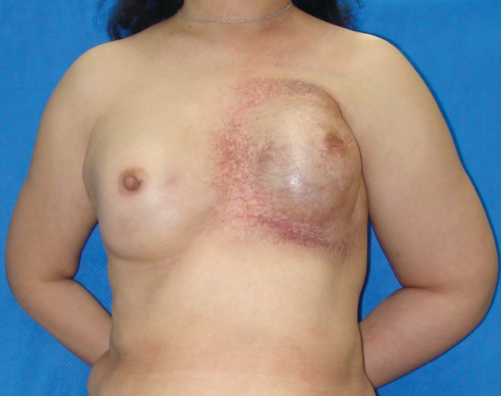

Supplement: gox-5-e1189-s001.pdf [file gox-5-e1189-s001.pdf]

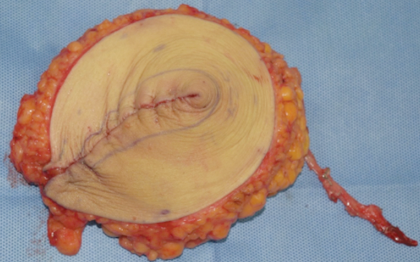

Supplement: gox-5-e1189-s002.pdf [file gox-5-e1189-s002.pdf]

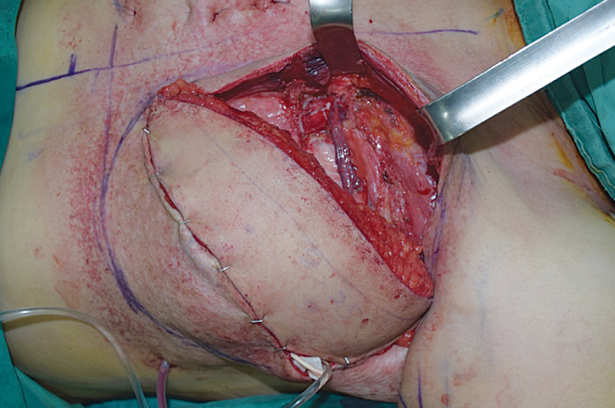

Supplement: gox-5-e1189-s003.pdf [file gox-5-e1189-s003.pdf]

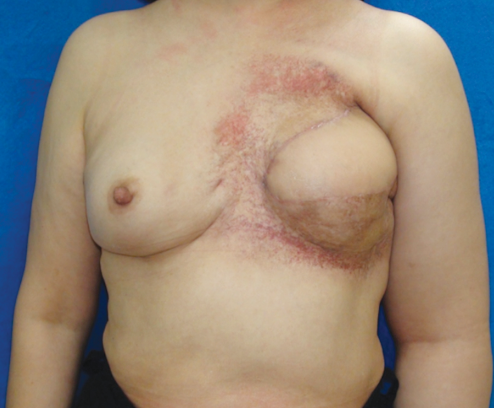

Supplement: gox-5-e1189-s004.pdf [file gox-5-e1189-s004.pdf]
